# Supplementary material for: Tumor-Derived CTHRC1 Mediates ITGB3-Dependent Osteoclast Differentiation to Promote Prostate Cancer Bone Metastasis
Source: Research Square preprint supplement (doi:10.21203/rs.3.rs-7693891/v1), 2025-10-08
Supplement: Supplementary file 1 [file 5a9c1a9204bb123d71651900.docx]

**Tumor-Derived CTHRC1 Mediates ITGB3-Dependent Osteoclast Differentiation to Promote Prostate Cancer Bone Metastasis**

**Tao Xie1†, Tianming Peng2†, Qu Li2†, Mingzhao Li1†, Qianyi Li3, Yu-Zhong Yu4, Jiehui Zhong1, Chong Wang1, Ming-Kun Chen5, Zhe-Sheng Chen6, Xian-Lu Song7*, Di Gu1*, Shan-Chao Zhao2***

**Supplementary Tables & Figures:**

**Supplementary Table S1. Correlation between CTHRC1 expression and clinicopathologic characteristics of prostate cancer patients**

|  |  | CTHRC1 expression | |  |  |
| --- | --- | --- | --- | --- | --- |
| Characteristics | n | Low(%) | High(%) | Z/χ2 value | *p* value |
| **H-Score** |  | 51.84±0.00 | 90.77±0.82 | -6.550 | <0.00a |
| **Age** |  |  |  | 0.000 | 1.000b |
| <70 | 38 | 19(63.33) | 19(63.33) |  |  |
| ≥70 | 22 | 11(36.67) | 11(36.67) |  |  |
| **T stage** |  |  |  | 0.606 | 0.436b |
| T1-T2 | 33 | 15(53.33) | 18(60.00) |  |  |
| T3-T4 | 27 | 15(46.67) | 12(40.00) |  |  |
| **Gleason score** |  |  |  | -0.506 | 0.613a |
| 3+3=6 | 11 | 4(13.33) | 7(23.33) |  |  |
| 3+4=7 | 28 | 18(60.00) | 10(33.33) |  |  |
| 4+3=7 | 16 | 6(20.00) | 10(33.33) |  |  |
| 4+4=8 | 4 | 2(6.67) | 2(6.67) |  |  |
| 4+5=9 | 1 |  | 1(3.33) |  |  |
| **Over-all survial**  **(month)** |  | 90.67±2.01 | 88.03±0.95 | -1.215 | 0.224a |
| **Recurrence stage** |  |  |  | 3.888 | 0.049b |
| Yes | 7 | 1(3.33) | 6(20.00) |  |  |
| No | 48 | 26(86.67) | 22(73.33) |  |  |
| **Survial stage** |  |  |  | 2.308 | 0.129b |
| Alive | 52 | 24(80.00) | 28(93.33) |  |  |
| Death | 8 | 6(20.00) | 2(6.67) |  |  |

a: Mann-Whitney U test.

b: Pearson χ2-test.

**Supplemental Table S2. shRNA sequence of CTHRC1.**

|  | **Sequence** |
| --- | --- |
| **shCTHRC1#1** | GCATCATTATTGAAGAACT |
| **shCTHRC1#2** | GCGTTCAAATAGTGCTCTA |
| **shCTHRC1#3** | GTTGCTATCTGGGTTGGTA |

**Supplemental Table S3. The primers used to amplify the indicated genes.**

| Gene | NCBI Gene ID |  | Primer sequence |
| --- | --- | --- | --- |
| GAPDH | 2597 | Forward | ACAACTTTGGTATCGTGGAAGG |
| Reverse | GCCATCACGCCACAGTTTC |
| CTHRC1 | 115908 | Forward | CTCGCTTCGGCTCAAATGC |
| Reverse | ATCCCTTCACAGAGTCCTTCCAC |
| m-GAPDH | 14433 | Forward | GCTGAGTATGTCGTGGAGTCT |
| Reverse | GGTTCACACCCATCACAAACA |
| m-ACP5 | 11433 | Forward | GCAACATCCCCTGGTATGTG |
| Reverse | GCAAACGGTAGTAAGGGCTG |
| m-CTSK | 13038 | Forward | CTCGGCGTTTAATTTGGGAGA |
| Reverse | TCGAGAGGGAGGTATTCTGAGT |
| m-NFATC1 | 18018 | Forward | GGAGAGTCCGAGAATCGAGAT |
| Reverse | TTGCAGCTAGGAAGTACGTCT |
| m-ALP | 11691 | Forward | ATCTTTGGTCTGGCTCCCATG |
| Reverse | TTTCCCGTTCACCGTCCAC |
| m-OSX | 170574 | Forward | CCCTTCTCAAGCACCAATGG |
| Reverse | AGGGTGGGTAGTCATTTGCATAG |
| m-RUNX2 | 12393 | Forward | AAATGCCTCCGCTGTTATGAA |
| Reverse | GCTCCGGCCCACAAATCT |
| m-RANKL | 21943 | Forward | TGTACTTTCGAGCGCAGATG |
| Reverse | ACATCCAACCATGAGCCTTC |
| m-OPG | 18383 | Forward | GGCTGAGTGTTTTGGTGGACAG |
| Reverse | GCTGGAAGGTTTGCTCTTGTGA |

**Abbreviations**

| Abbreviations | Full text |
| --- | --- |
| PCa | prostate cancer |
| bmPCa | bone metastatic cancer |
| RANKL | nuclear factor-κB ligand receptor activator |
| OPG | osteoprotegerin |
| TGF-β | transforming growth factor beta |
| CTHRC1 | collagen Triple Helix Repeat Containing 1 |
| Co-IP | co-immunoprecipitation |
| MS | mass spectrometry |
| ITGB3 | integrin beta 3 |
| GEO | Gene Expression Omnibus |
| TCGA | The Cancer Genome Atlas |
| BMMs | bone marrow-derived macrophages |
| rCTHRC1 | recombinant CTHRC1 protein |
| GSEA | gene set enrichment analysis |
| KEGG | Kyoto Encyclopedia of Genes |
| IHC | Immunohistochemistry |
| TMA | tissue microarray |
| H&E | hematoxylin-eosin |
| qRT-PCR | quantitative real-time PCR |
| CM | conditioned medium |
| ELISA | enzyme-linked immunosorbent assay |
| CCK-8 | cell counting kit-8 |
| EdU | 5-Ethynyl-2'-deoxyuridine |
| anti-CTHRC1 | CTHRC1 blocking peptide |
| anti-ITGB3 | ITGB3 blocking antibodies |
| TRAP | tartaric acid phosphatase |
| ALP | alkaline phosphatase |
| EMT | epithelial-to-mesenchymal transition |
| OPs | osteoclast precursor cells |


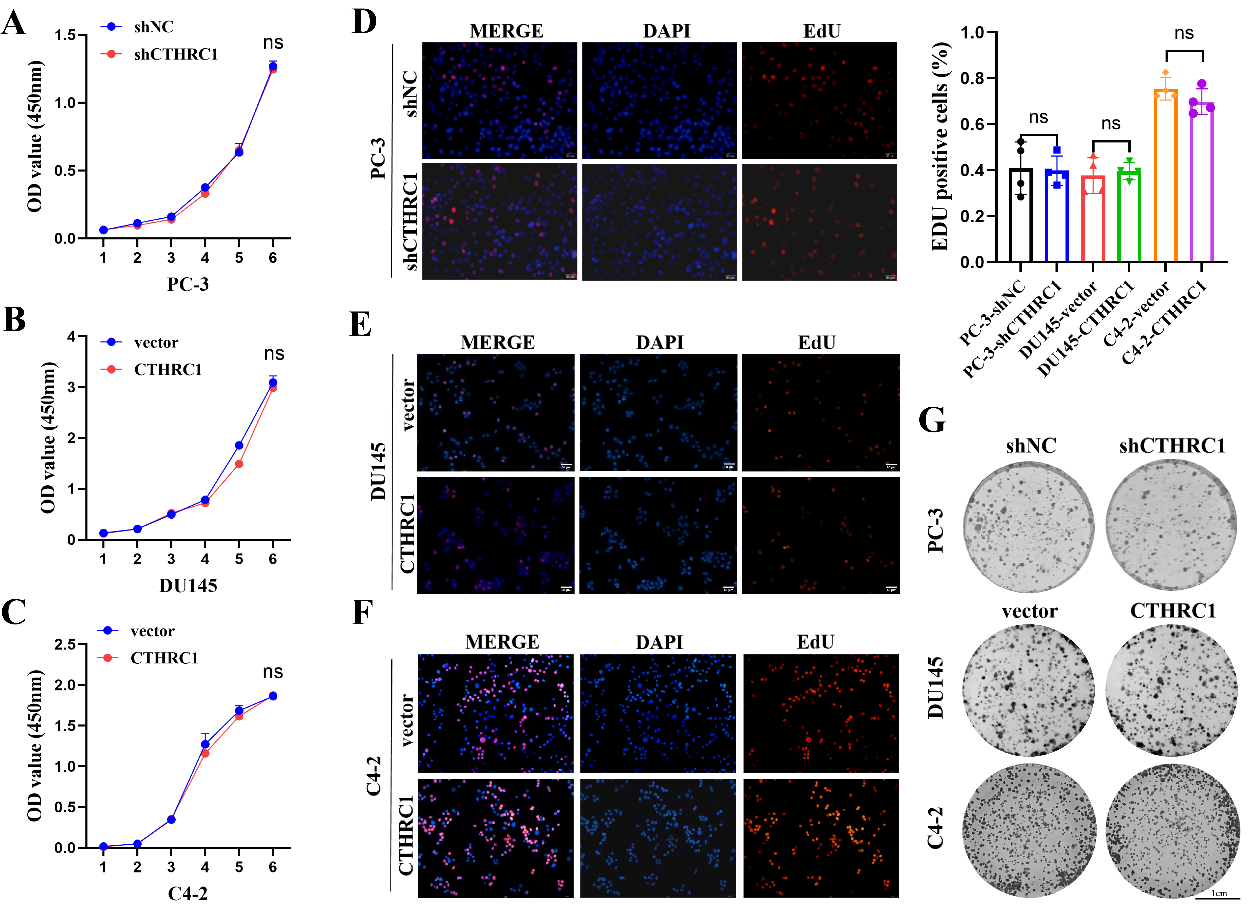


**Supplementary Fig.1 CTHRC1 has no impact on the proliferative capacity of PCa cells**

(A-C) CCK-8 assay of cell proliferation in transfected PCa cells.

(D-F) EdU incorporation was visualized by fluorescence micrographs and the rate of EdU positive transfected PCa cells was quantified (scale bar, 50 μm)

(G) Colony formation assay of transfected PCa cells (scale bar, 1cm).

ns: no significant.


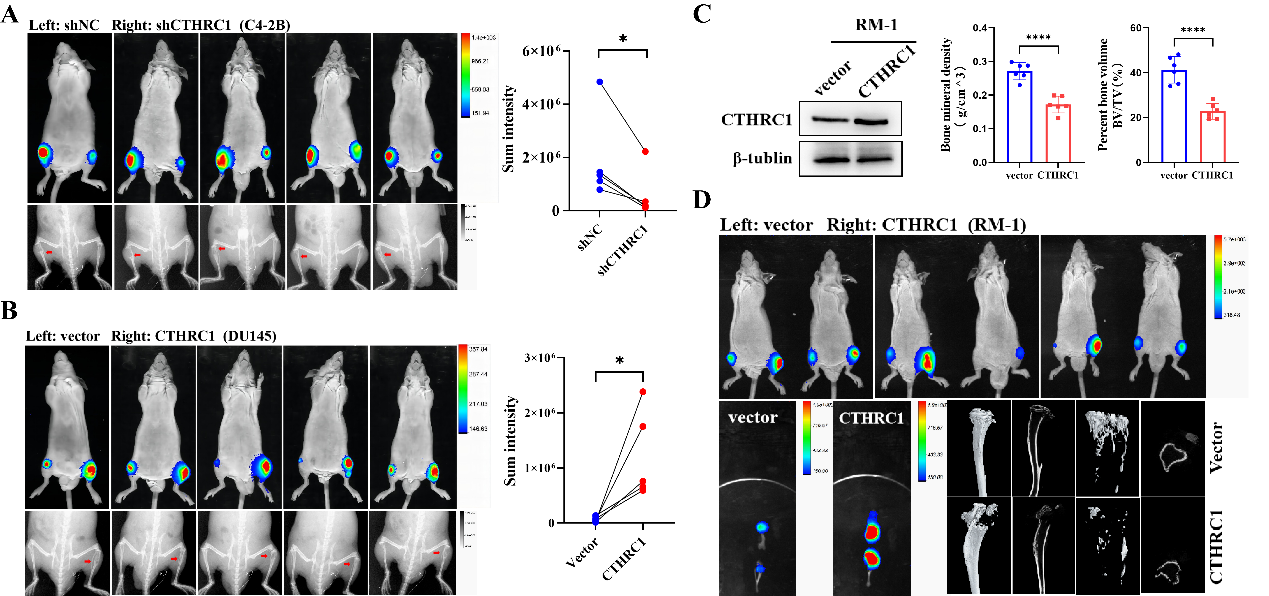


**Supplementary Fig.2 PCa-derived CTHRC1 promotes bone destruction and osteolysis.**

(A-B) Representative bioluminescent images and mice X-ray images of tibial injected mice (left tibia with control PCa cells and right tibia with C4-2B-shCTHRC1 or DU145-CTHRC1 cells injection for the same mouse). Arrows indicate osteolytic lesions.

(C) Western blotting to determine the expression of CTHRC1 in transfected RM-1 cells.

(D) Representative in vivo bioluminescent images from left cardiac ventricle injected mice (left mice with RM-1-vector and right mice with RM-1-CTHRC1 injection in the same image). In vitro bioluminescent and micro-CT images of tibia from tibial injected mice with transfected RM-1 cells. Quantification of bone parameters included mineral density and bone/tissue volume ratio (BV/TV).

**P*<0.05 and *****P*<0.0001.


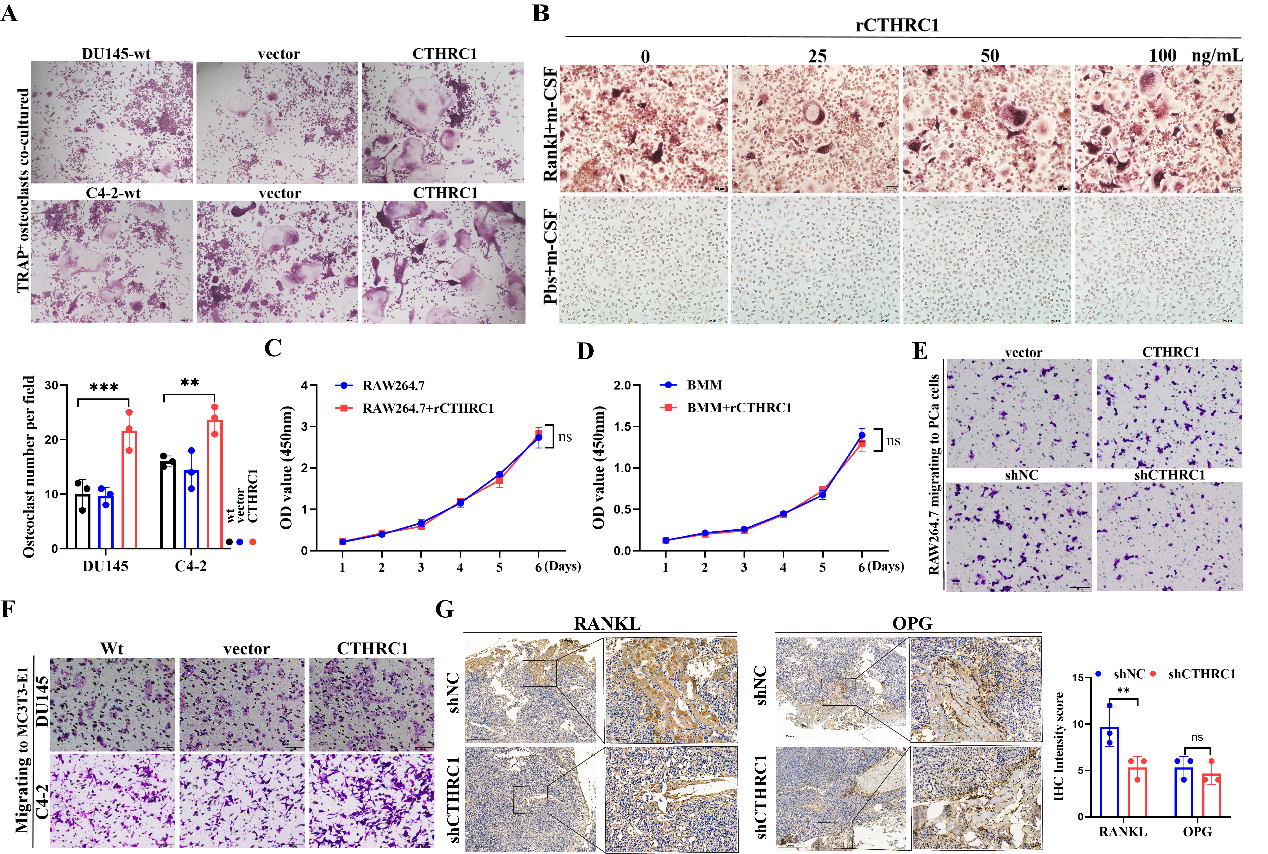


**Supplementary Fig.3 CTHRC1 recruits osteoclasts and promotes osteoclastogenesis without affecting their proliferation.**

(A) TRAP stanning to quantify the number of TRAP+ mature osteoclasts in co-culture system between RAW264.7 and transfected overexpression CTHRC1 PCa cells, in the presence of RANKL (scale bar, 100 μm).

(B) TRAP staining following differentiation of BMMs cells to verify TRAP+ mature osteoclasts under stimulation with or without RANKL (50 ng/mL), M-CSF (30 ng/ml), and varying doses of rCTHRC1 (scale bar, 100 μm).

(C-D) CCK-8 assay of cell proliferation of RAW264.7 and BMMs cells treated with rCTHRC1.

(E) Transwell migration assays of RAW264.7cells toward transfected PCa cells (scale bar, 50 μm).

(F) Transwell migration assays of wild type and transfected overexpression CTHRC1 PCa cells toward MC3T3-E1 cell (scale bar, 50 μm).

(G) IHC staining of RANKL and OPG in mice bone metastasis lesions from tibial injected mice (scale bar, 500 μm and 100 µm).

ns: no significant, ***P*<0.01, and ****P*<0.001.
